# Supplementary material for: Differential Repeat Accumulation in the Bimodal Karyotype of Agave L
Source: MDPI journal article supplement (doi:10.3390/genes14020491), 2023-02-15
Supplement: s1 [file s1]

**Supplementary Table S1.** *Primers* used for amplification and isolation of repetitive sequences

| Primer name       | Sequence (5'-3')  | Size<br>(bp) | Ta<br>(°C) | GC<br>(%) | Fragment<br>(bp) |
|-------------------|-------------------|--------------|------------|-----------|------------------|
| OgreCL39Ctg378F   | TAGTGAATGTCTTTGGG | 23           | 62,9       | 47,8      | 548              |
|                   | CCTACC            |              |            | 3         |                  |
| OgreCL39Ctg378R   | TGCTTCAGACACGAAG  | 23           | 61,1       | 43,4      |                  |
|                   | ATCTTGA           |              |            | 8         | 284              |
| SIRECL22Ctg385F   | TGCAAGAAGAAAACCC  | 23           | 59,3       | 39,1      |                  |
|                   | AAGTGAA           |              |            | 4         |                  |
| SIRECL22Ctg385R   | AGGACATGCATCTTTTG | 23           | 61,1       | 43,4      | 698              |
|                   | ACCATC            |              |            | 8         |                  |
| TarCL121Ctg47F    | GCTTGAGTCTCCTATTT | 23           | 62,9       | 47,8      |                  |
|                   | TGTGGC            |              |            | 3         | 498              |
| TarCL121Ctg47R    | CACCCCCACATTTTGAG | 23           | 62,9       | 47,8      |                  |
|                   | GTAATG            |              |            | 3         |                  |
| ChromoCL32Ctg253F | AATCTCTGGTCCCAAA  | 23           | 62,9       | 47,8      | 512              |
|                   | AGACTCC           |              |            | 3         |                  |
| ChromoCL32Ctg253R | GGCATTACCTCGTAGTC | 23           | 64,7       | 52,1      |                  |
|                   | CTAAGG            |              |            | 7         | 583              |
| AthilaCL9Ctg216F  | CTTTTGGTGATCCGAGC | 23           | 62,9       | 47,8      |                  |
|                   | ATTCTC            |              |            | 3         |                  |
| AthilaCL9Ctg216R  | CTGTGCCAACTAAGAC  | 23           | 62,9       | 47,8      | 171              |
|                   | GAATGAC           |              |            | 3         |                  |
| TorkCL10Ctg699F   | AAACGACCTGTCTAAT  | 23           | 61,1       | 43,4      |                  |
|                   | CCTGCAT           |              |            | 8         | 171              |
| TorkCL10Ctg699R   | TTTCAGATCAGGTGGA  | 23           | 62,9       | 47,8      |                  |
|                   | GACTTCG           |              |            | 3         |                  |
| SatCL3Ctg1182F    | CTAGATTGAAACCCGA  | 24           | 61,8       | 41,6      | 171              |
|                   | AACAAGGT          |              |            | 7         |                  |
| SatCL3Ctg1182R    | ACTTTCAACCCCAATTA | 23           | 61,1       | 43,4      |                  |
|                   | GCCTGA            |              |            | 8         |                  |
